# Supplementary material
Source: Springer Nature journal article supplement (https://www.springermedizin.de/resource/supplementary/12984_2009_243_MOESM2_ESM.pdf/9605606)

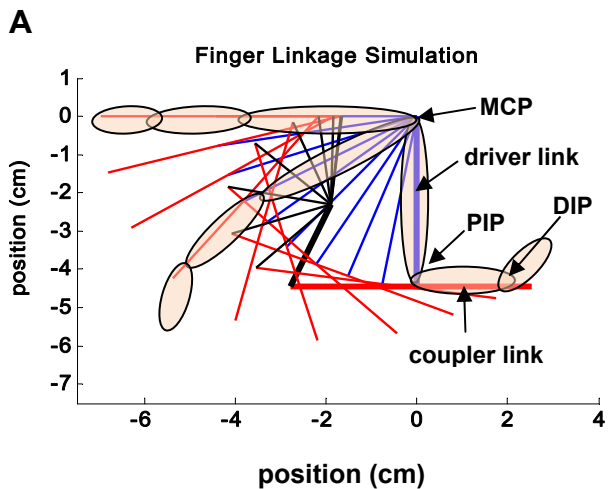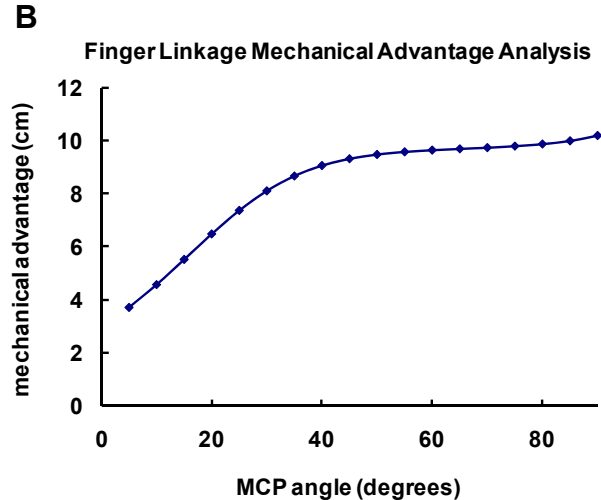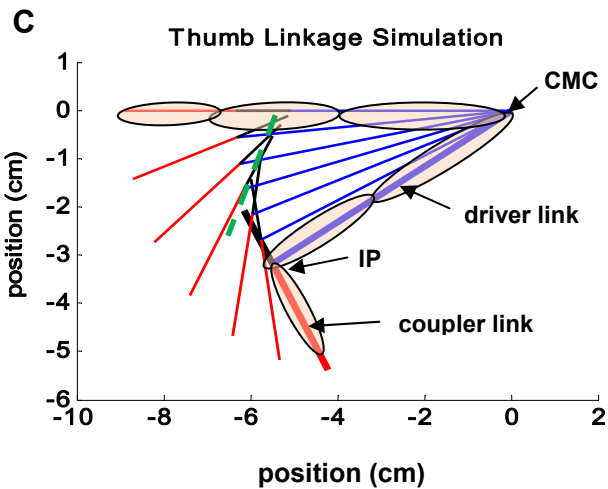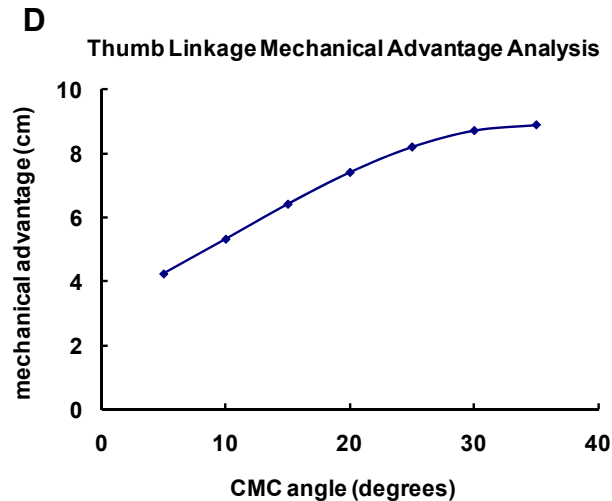

Supplement: MOESM2 [file 9605606]
